# Supplementary material for: A Natural System of Chromosome Transfer in Yersinia pseudotuberculosis
Source: PLOS journal article supplement (doi:10.1371/journal.pgen.1002529), 2012-03-08
Supplement: S2 (10.1371/journal.pgen.1002529.s002) [file journal.pgen.1002529.s002]

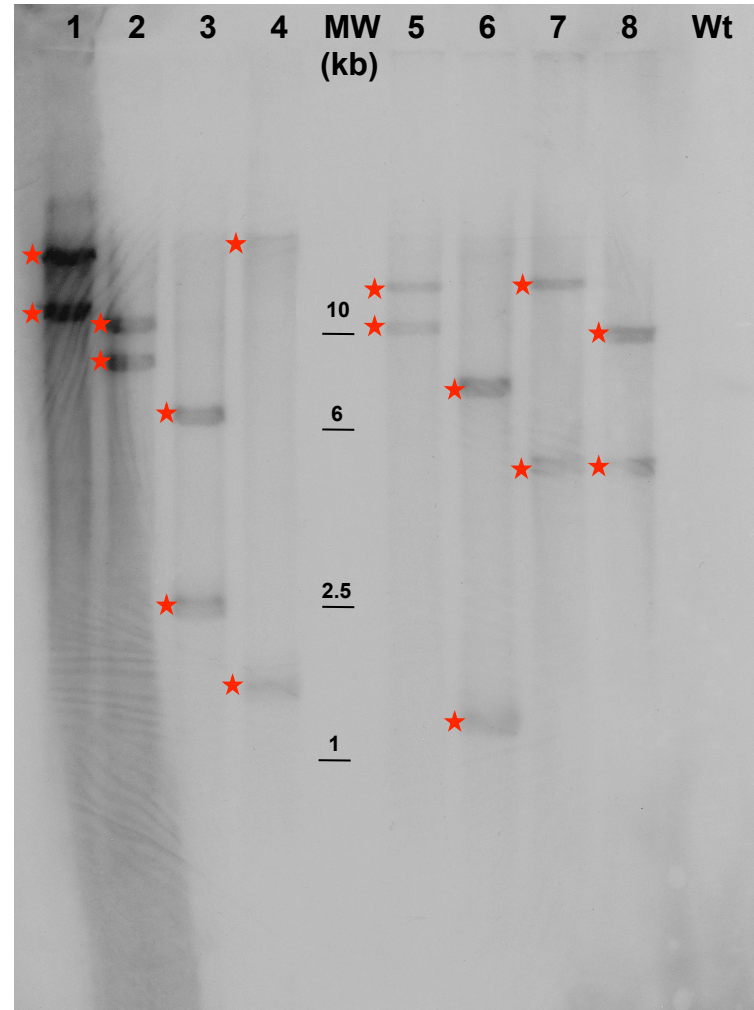

★ : ISYps1 copy

Wt: ω4826 recipient
